# Supplementary material for: Suppression of Ventilation-Induced Diaphragm Fibrosis through the Phosphoinositide 3-Kinase-γ in a Murine Bleomycin-Induced Acute Lung Injury Medel
Source: Preprints.org preprint supplement (doi:10.20944/preprints202404.1231.v1), 2024-04-18
Supplement: Supplementary file 1 [file supplementary]

**Table S1. Physiologic conditions at the beginning and end of ventilation.**

|  | Nonventilated | Nonventilated  with bleomycin | VT 6 ml/kg with bleomycin | VT 10 ml/kg with bleomycin | VT 10 ml/kg  with bleomycin, AS605240 | VT 10 ml/kg  with bleomycin, PI3Kγ-/- | |
| --- | --- | --- | --- | --- | --- | --- | --- |
| PH | 7.41±0.07 | 7.38±0.05 | 7.33±0.09 | 7.38±0.05 | 7.39±0.07 | 7.36±0.08 | |
| PaO2 (mmHg) | 98.4±0.3 | 96.1±0.3 | 85.8±0.3* | 76.7±2.6* | 84.9±2.1* | 86.5±1.8* | |
| PaCO2 (mmHg) | 39.1±0.4 | 39.8±0.2 | 40.3±1.2 | 36.8±1.2 | 37.8±1.4 | | 37.4±1.2 |
| MAP (mmHg) |  |  |  |  |  | |  |
| Start | 85.4±1.2 | 83.5±0.4 | 84.7±1.1 | 81.7±2.5 | 83.8±2.2 | | 84.2±1.9 |
| End | 85.0±0.4 | 80.7±0.2 | 79.2±2.1* | 75.1±2.4* | 78.7±1.9* | | 79.8±2.1* |
| PIP (mmHg) |  |  |  |  |  | |  |
| Start |  |  | 16.0±1.2 | 16.7±1.3 | 16.3±1.1 | | 16.2±1.1 |
| End |  |  | 17.0±1.4 | 17.9±1.5 | 17.5±1.4 | | 17.3±1.4 |

At the end of the study period, we obtained data of mean arterial pressure and arterial blood gases from the nonventilated control mice and mice ventilated at a tidal volume of 6 ml/kg or 10 ml/kg for 8 h (n = 10 per group). The normovolemic statuses of mice were maintained by monitoring mean artery pressure. Data are presented as means ± SDs. * Indicates that P < 0.05 when compared to the nonventilated control mice with bleomycin pretreatment. MAP = mean arterial pressure; PI3Kγ-/- = phosphoinositide 3-kinase-γ-deficient mice; PIP = peak inspiratory pressure; VT = tidal volume.
